# Supplementary material
Source: PubMed Central journal article supplement (PMC3374069)
Supplement: NIHMS365982-supplement-Supp_Fig_S1-S2___Table_S1-S2.pdf [file NIHMS365982-supplement-Supp_Fig_S1-S2___Table_S1-S2.pdf]

## **Supplementary Methods**

### **Tumorigenesis and serial tumour transplantation:**

FLK-1 ( $1 \times 10^6$ ) were inoculated s.c. into NOD/SCID mice with or without HK cells ( $1 \times 10^6$ ) for the primary tumour formation. For the secondary transplantations, primary tumours were removed when they reached 1 cubic cm in size. Single cell suspensions were isolated from primary tumours and then tumour cells were re-injected s.c. into new NOD/SCID mice with HK cells ( $1 \times 10^6$ ). The experiments were repeated for the third and fourth transplantations.

### **Lymphoma cell growth assay:**

Primary lymphoma FLA-1 cells ( $2 \times 10^4$  cells/well) were cultured in Iscove's media containing 10% FCS with or without irradiated HK cells (50 Gy,  $2 \times 10^4$  cells/well) that were seeded in 24 well plates one day before. Viable lymphoma cells were counted using trypan blue exclusion after three days. Triplicate data from 1 out of 4 similar experiments are shown.

### Supplementary Figure 1: FDC express CXCL12

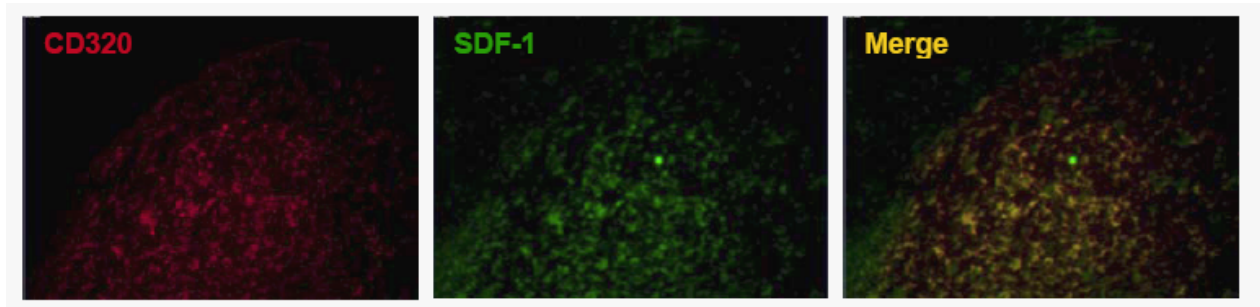

Immunofluorescent staining of frozen tonsil slides with PE-conjugated anti-CD320 (an FDC marker, red) and mouse anti-human CXCL12 Ab followed by FITC-conjugated goat anti-mouse Ig Ab (green). Yellow color in merge shows co-expression of both Ags in GC.

Supplementary Figure 2: FL cells depend on HK cell for growth and tumour formation

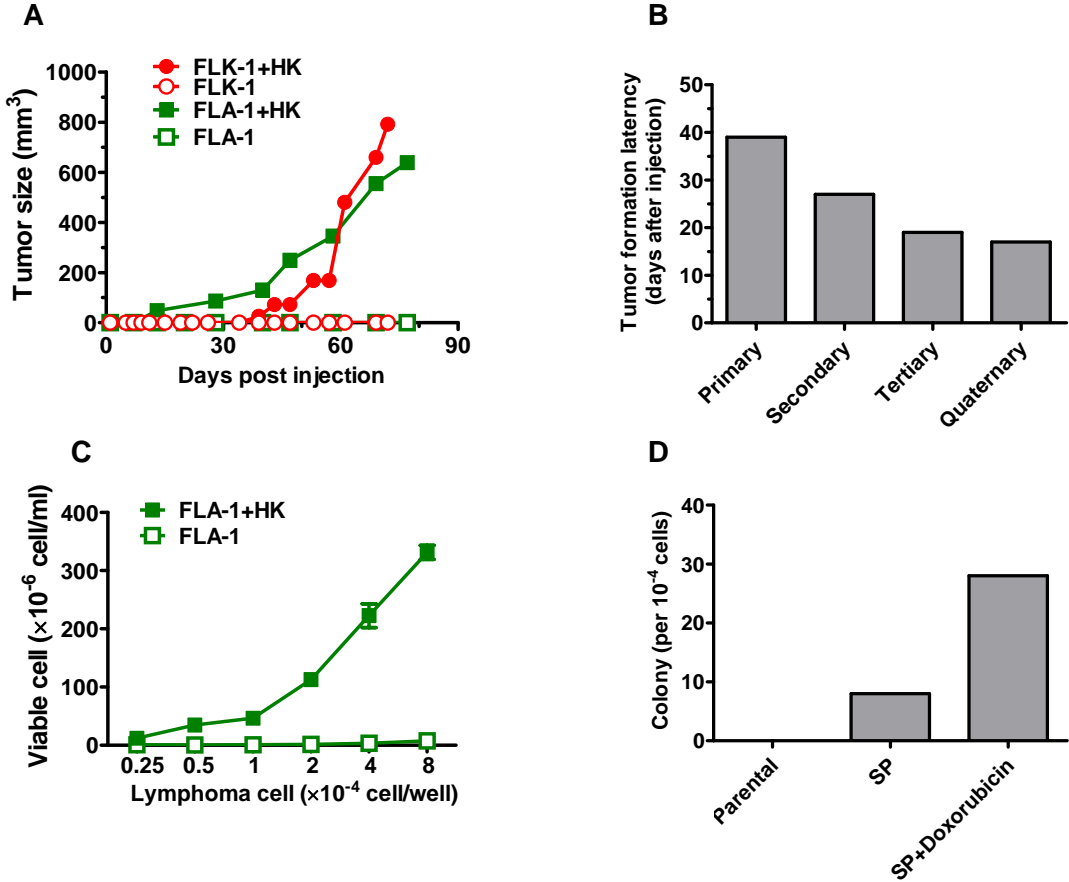

(A). FLK-1 ( $4 \times 10^6$ ) or FLA-1 ( $8 \times 10^6$ ) cells were inoculated s.c. into NOD/SCID mice with (solid figures) or without (empty figures) HK cells ( $1 \times 10^6$ ). Tumour sizes in  $\text{mm}^3$  were measured at the indicated time points. (B). Serial transplantation results. FLK-1 cells or tumour cells from xenopants were mixed with HK cells for a serial transplantation. Bars show visible tumour formation time (days) after injection. (C). FLA-1 cells ( $0.25$  to  $8 \times 10^4$  cell/well) were cultured without (empty figures) or with (solid figures) HK cells ( $2 \times 10^4$  cell/well). Viable lymphoma cells were counted after three days. Triplicate data from 1 out of 4 similar experiments were shown. (D). Parental and SP cells isolated from FLA-1 lymphoma cells were examined for methylcellulose colony formation. Data represent number of colony formation cells per  $1 \times 10^4$  cells.

**Supplementary Table 1:**

| <b>FL cell phenotypes</b> |                    |              |                   |                     |
|---------------------------|--------------------|--------------|-------------------|---------------------|
| <b>Surface markers</b>    | <b>FLK-1</b>       | <b>FLA-1</b> | <b>GC B cell</b>  | <b>Naïve B cell</b> |
| <b>CD10</b>               | ++*                | +            | +                 | -                   |
| <b>CD19</b>               | +                  | +            | +                 | +                   |
| <b>CD20</b>               | ++                 | ++           | +                 | +                   |
| <b>CD38</b>               | ++ <sup>high</sup> | ++           | + <sup>high</sup> | + <sup>low</sup>    |
| <b>CD44</b>               | ±                  | ±            | -                 | +                   |
| <b>CD77</b>               | ±                  | ±            | +                 | -                   |
| <b>CD27</b>               | +                  | +            | +                 | -                   |
| <b>CD34</b>               | -                  | -            | -                 | -                   |
| <b>CD133</b>              | -                  | -            | -                 | -                   |
| <b>CD117</b>              | -                  | -            | -                 | +                   |
| <b>CD24</b>               | ++                 | ±            | -                 | -                   |
| <b>Surface IgD</b>        | -                  | -            | -                 | +                   |

\*: “++” indicates >80% positive, “+” for >30-80% positive; “±” for 5-30% positive; and “-” for <5% positive

**Supplementary Table 2:**

| <b>FLK-1 SP cell phenotypes</b> |                 |           |
|---------------------------------|-----------------|-----------|
| <b>Surface markers</b>          | <b>FLK-1</b>    |           |
|                                 | <b>Parental</b> | <b>SP</b> |
| <b>CD10</b>                     | 99.2*           | 99.7      |
| <b>CD20</b>                     | 98.8            | 96.9      |
| <b>CD38</b>                     | 99.2            | 99.7      |
| <b>CD24</b>                     | 99.4            | 99.4      |
| <b>CD44</b>                     | 1.64            | 1.40      |
| <b>CD34</b>                     | 0.89            | 0.57      |
| <b>CD133</b>                    | 0.25            | 0.26      |
| <b>ABCG2</b>                    | 1.14            | 60.8      |

\*: Number indicates positive percentage.
